# Supplementary material for: Capn5 Expression in the Healthy and Regenerating Zebrafish Retina
Source: PubMed Central journal article supplement (PMC6054427; doi:10.1167/iovs.18-24278), 2018-07
Supplement: iovs-59-07-49_s03.pdf [file iovs-59-07-49_s03.pdf]

**Table 1:**

| Gene          | Forward Primer         | Reverse Primer             | Product Size |                       |
|---------------|------------------------|----------------------------|--------------|-----------------------|
| <i>capn1a</i> | CTGGAGGATGAGGAAGAAA    | TATCTAGAGTGAGGTTACAGCAGGA  | 637 bp       | RT-PCR and Riboprobes |
| <i>capn1b</i> | CAGAAAGGCGAGTGGGTA     | GAGCATCAGGAGTGAGGTTG       | 610 bp       | RT-PCR and Riboprobes |
| <i>capn2a</i> | GCGAACGATTTTCAACA      | CACATTTACACATTCCTGG        | 556 bp       | RT-PCR and Riboprobes |
| <i>capn2b</i> | ACTTCTGCCTGCGTGTCTTC   | ATTCTAGATTGAGTGCTGTGCTTTGA | 650 bp       | RT-PCR and Riboprobes |
| <i>capn5a</i> | TCCATCAGAGCCACAACCTCAG | AGATGGAGCTGCCACTGAT        | 652 bp       | RT-PCR and Riboprobes |
| <i>capn5b</i> | CGCAGAGCTACTCAAAGGAG   | ACCCAGGAAGGTGTCAACAAT      | 558 bp       | RT-PCR and Riboprobes |
| <i>capn1a</i> | GATAAAGATGGGAGCGACG    | CTGATTCTACAGCGAGACGCA      | 148 bp       | qPCR primers          |
| <i>capn1b</i> | AGAAGGACAGAGCAACATTC   | ATAAAGGTCTCGGAGCGTGC       | 148 bp       | qPCR primers          |
| <i>capn2a</i> | GCTCTGTTGGGATGCTCCAT   | GCACTCGGACCAGCTTTTCT       | 148 bp       | qPCR primers          |
| <i>capn2b</i> | AGCTCGGGAACCATAAGCAC   | TCAGGCAGGACACGAAGTTG       | 148 bp       | qPCR primers          |
| <i>capn5a</i> | TGCCATCTCAGAAAACCTTG   | CACAGGCTCAGGAACAGTCA       | 132 bp       | qPCR primers          |
| <i>capn5b</i> | TGTTTACAGCAGGCAGGACAA  | ATGGAGCTGCCACTGATTT        | 108 bp       | qPCR primers          |
| <i>atp5h</i>  | TTTGAGGGGCAGCATTACTCC  | CCCCTGGTAGAAGAGCGAATC      | 200 bp       | RT-PCR and Riboprobes |

**Table 1.** Primer sequences used for RT-PCR and qPCR. RT-PCR primers were also used to design WISH and FISH probes.
