# Supplementary material for: Capn5 Expression in the Healthy and Regenerating Zebrafish Retina
Source: PubMed Central journal article supplement (PMC6054427; doi:10.1167/iovs.18-24278), 2018-07
Supplement: iovs-59-07-49_s04.pdf [file iovs-59-07-49_s04.pdf]

Table 2.  
 Primary antibodies used in this study

| <b>Antibody</b> | <b>Labels</b>      | <b>Raised in</b> | <b>Dilution</b> | <b>Acquired from</b>                 |
|-----------------|--------------------|------------------|-----------------|--------------------------------------|
| <b>Zpr-1</b>    | red/green<br>cones | mouse            | 1:20            | <b>ZIRC</b>                          |
| <b>4C12</b>     | rods               | mouse            | 1:100           | James Fadool<br>FSU, Tallahassee, FL |
| <b>Zrf-1</b>    | Müller glia        | mouse            | 1:5000          | <b>ZIRC</b>                          |
| <b>N1C1</b>     | Capn5              | rabbit           | 1:100           | <b>GeneTex</b>                       |
| <b>GFP</b>      | GFP                | rabbit           | 1:1000          | <b>abcam</b>                         |

**Table 2.** Antibodies used for immunohistochemistry (IHC).
